# Supplementary material for: Lessons learned on the experienced facilitators and barriers of implementing a tailored VBHC model in a Dutch university hospital from a perspective of physicians and nurses
Source: HighWire-hosted journal article supplement (doi:10.1136/bmjopen-2021-051764), 2022-01-01
Supplement: bmjopen-2021-051764supp001_data_supplement.pdf [file bmjopen-2021-051764supp001_data_supplement.pdf]

**Appendix 1: Topic list**

Based on the CFIR framework, the following topics have been asked to answer the research question.

**1. Intervention characteristics**

How long ago did you start with the implementation of this VBHC approach?

What was your role in the implementation of this VBHC approach?

Can you tell what steps were taken in the design-building/implementation phase of this VBHC approach?

Can you tell which elements of this overview (showing the circle with 'patient as partner') you have (A) implemented, (B) not implemented or (C) implementing in your department, and you are here with the process now?

What was the most important reason for you to take part or to be the initiator?

How did you generally experience the methodology?

What do you think of the role of the patient within the value driven care team?

Is the role of the patient in the team feasible in the longer term and is it clear what the role of the patient in the team is?

What has the implementation of this VBHC approach brought to your department?

**2. Process**

What are your experiences with the planning made for the implementation process?

Are there steps in the implementation process of value driven care that you would have liked to see differently?

Are there steps in the implementation process that you have experienced as pleasant or not?

Have you experienced any bottlenecks?

**3. Inner setting**

What are your experiences with the motivation of the team and the department for value driven care and is there a difference between the start and now?

If so, how is that possible?

Do you feel that the department was ready for the implementation of value driven care?

What are your experiences with the pressure of your colleagues or the group on the implementation success?

Which factors made this process successful?

Are there factors that make it not yet running as desired (within the team)? (Culture?)

What are your experiences with the leadership and guidance of the implementation?

**4. Outer setting**

How do you feel about departments that have not yet added value driven care, or are not yet working with it?

Do you feel supported by the other departments that are implementing value driven care?

Do you feel that the supporting branches within this organization, such as the Executive Board/BI or other support, facilitates and stimulates you in the implementation?

Do you feel that this has a positive or negative influence on the implementation within the department?

**5. Characteristics of individuals**

Do you feel that the team members have/are equipped with sufficient competencies to implement the value driven care?

What is your experience regarding the knowledge you have about the implementation?

Is your knowledge sufficient, and did you get enough help to increase your knowledge?

What personal qualities do you have that have helped you implement value driven care?
