# Supplementary material for: Lessons learned on the experienced facilitators and barriers of implementing a tailored VBHC model in a Dutch university hospital from a perspective of physicians and nurses
Source: HighWire-hosted journal article supplement (doi:10.1136/bmjopen-2021-051764), 2022-01-01
Supplement: bmjopen-2021-051764supp002_data_supplement.pdf [file bmjopen-2021-051764supp002_data_supplement.pdf]

## Appendix 2: Codebook

Codebook 'Research into the facilitators and barriers of the implementation of the value-based health care approach in the Amsterdam UMC'

### Characterization

'(+)' = In this context this concept is a facilitator. A facilitator is a factor that helps or has a positive influence on the implementation.

'(-)' = In this context this concept is a barrier. A barrier is a factor that works against or has a negative influence on the implementation.

#### 1 Definition of value-based health care

| Domein                                  | Code in Atlas.ti | Omschrijving van de code                                                  |
|-----------------------------------------|------------------|---------------------------------------------------------------------------|
| 1 Definition of value-based health care | 1. Definitie WGZ | Alle definities van de WGZ zoals die worden ervaren door de respondenten. |

#### 2 Intervention characteristics

| Domain                         | Code in Atlas.ti                                                    | Omschrijving van de code                                                                                                                                                                                                                            |
|--------------------------------|---------------------------------------------------------------------|-----------------------------------------------------------------------------------------------------------------------------------------------------------------------------------------------------------------------------------------------------|
| 2 Intervention characteristics | 1. (-) Het directe belang/gewenste effect WGZ is niet geconstateerd | Het directe belang of het gewenste effect wat WGZ zou brengen is niet te zien of uit het oog verloren in de praktijk.                                                                                                                               |
| 2 Intervention characteristics | 2. (+) Het (ervaren) nut wat WGZ heeft gehad                        | Het nut wordt ingezien per afdeling op verschillende aspecten van de WGZ-implementatie. Het gaat om de baat en het voordeel die de afdeling heeft gehad om de WGZ-implementatie uit te voeren (bijv. waarom zou je als afdeling WGZ implementeren). |
| 2 Intervention characteristics | 3. (+) Professionalisering zorgverlener                             | Kennisontwikkeling, verantwoordelijkheden en positie van de zorgverlener zijn ontwikkeld tijdens en dankzij de het ontwikkelproces /implementatie van WGZ.                                                                                          |

|                                |                                                                     |                                                                                                                                                                                                                                                                                                                 |
|--------------------------------|---------------------------------------------------------------------|-----------------------------------------------------------------------------------------------------------------------------------------------------------------------------------------------------------------------------------------------------------------------------------------------------------------|
| 2 Intervention characteristics | 4. (-) Dashboard is (nog) niet werkbaar                             | Het dashboard is nog niet (volledig) bruikbaar in de praktijk wat WGZ-implementatie lastig maakt in de dagelijkse werkzaamheden. (Gericht op de praktische uitvoering. Als het gericht is op continu verbeteren hoort het bij het thema 'Process' code '(-) Sturen op continue verbetering nog niet mogelijk'). |
| 2 Intervention characteristics | 5. (+) Dashboard is zinvol                                          | Het dashboard vind men zinvol in het gebruikt in de dagelijkse praktijk.                                                                                                                                                                                                                                        |
| 2 Intervention characteristics | 6. (-) Registratie in Epic is niet volledig                         | Het registreren van gegevens in Epic is onlogisch in het gebruik en rapporten zijn niet volledig.                                                                                                                                                                                                               |
| 2 Intervention characteristics | 7. (+) Oplossingen voor het registreren in Epic                     | Het lange wachten op de ontwikkeling van de functionaliteit in Epic wordt op verschillende manieren opgelost buiten Epic om.                                                                                                                                                                                    |
| 2 Intervention characteristics | 8. (-) Werken/verwerken PROM's/PREM's (met patiënt) lastig          | Werken met PROM's/PREM's (in de spreekkamer) is lastig en nu nog niet (geheel) mogelijk.                                                                                                                                                                                                                        |
| 2 Intervention characteristics | 9. (+) PROM's/PREM's gebruiken voor meten                           | Meten van PROM's/PREM's heeft verschillende voordelen voor arts?                                                                                                                                                                                                                                                |
| 2 Intervention characteristics | 10. (-) Nadeel van WGZ ten opzichte van andere managementmodellen   | WGZ heeft een nadeel ten opzichte van andere managementmodellen waarvan geleerd is/waarvan geleerd kan worden bij een volgende implementatie.                                                                                                                                                                   |
| 2 Intervention characteristics | 11. (+) Voordeel van WGZ ten opzichte van andere managementmodellen | WGZ heeft voordeel ten opzichte van andere managementmodellen, waarbij WGZ zich dus onderscheidt van andere modellen en wat de WGZ-implementatie aantrekkelijk maakt.                                                                                                                                           |
| 2 Intervention characteristics | 12. (-) Samen beslissen ethisch lastig                              | Niet alles wat een patiënt wil bij samen beslissen is mogelijk wat ethische vraagstukken oplevert.                                                                                                                                                                                                              |
| 2 Intervention characteristics | 13. (+) Samen beslissen werkt prettig                               | Samen beslissen werkt prettig in de dagelijkse praktijk.                                                                                                                                                                                                                                                        |

|                                |                                                                      |                                                                                                                                                                         |
|--------------------------------|----------------------------------------------------------------------|-------------------------------------------------------------------------------------------------------------------------------------------------------------------------|
| 2 Intervention characteristics | 14. (-) De inrichting van de WGZ- implementatie is heel veel/complex | De WGZ-implementatie is een langdurig traject met veel specifieke stappen. Het is een eindeloos proces.                                                                 |
| 2 Intervention characteristics | 15. (-) Inzichten in randvoorwaarden                                 | De zorgverlener vindt het belangrijk de data te kunnen interpreteren/te kunnen gebruiken, maar heeft geen zicht op de randvoorwaarden die nodig zijn dat te realiseren. |
| 2 Intervention characteristics | 16. (-) Financiële/praktische realisatie lastig buiten WGZ om        | Het is lastig om zaken buiten het project georganiseerd te krijgen.                                                                                                     |
| 2 Intervention characteristics | 17. (-) Impact van digitalisering                                    | Digitalisering die gepaard gaat met de WGZ- implementatie is niet vanzelfsprekend bij zorgmedewerkers op afdelingen.                                                    |
| 2 Intervention characteristics | 18. (+) Karakteristieken van de aandoening/ziekte                    | Aandoening/zorg leent zich goed voor WGZ vanwege de eigenschappen die deze bepaalde ziekte heeft.                                                                       |

### 3 Process

| Domain    | Code in Atlas.ti                                                                  | Omschrijving van de code                                                                                                                             |
|-----------|-----------------------------------------------------------------------------------|------------------------------------------------------------------------------------------------------------------------------------------------------|
| 3 Process | 1. (-) Vier fases (methode) moeizame uitvoering                                   | De uitvoering van het proces zoals beschreven in de WGZ-methode is verwarrend, niet structureel en niet zoals verwacht en er is niet veel verandert. |
| 3 Process | 2. (-) WGZ- implementatie theoretische methode is lastig naar praktijk te brengen | De stappen die gemaakt moeten worden om de WGZ-methodiek te gaan gebruiken is in de praktijk is niet aanwezig of niet bekend.                        |
| 3 Process | 3. (+) Vier fases (methode) geeft structuur/prettig om mee te werken              | De WGZ-methodiek is duidelijk en geeft structuur.                                                                                                    |

|           |                                                             |                                                                                                                                                                            |
|-----------|-------------------------------------------------------------|----------------------------------------------------------------------------------------------------------------------------------------------------------------------------|
| 3 Process | 4. (-) Planning van WGZ-methodiek                           | Frustratie door de planning van de WGZ-methodiek/het proces.                                                                                                               |
| 3 Process | 5. (-) Afhankelijk van anderen                              | De afdeling is afhankelijk van andere afdelingen bij de voortgang van de WGZ-implementatie.                                                                                |
| 3 Process | 6. (+) Begeleiding door het WGZ-team                        | Voldoende en goede deskundige begeleiding bij de uitvoering van het proces door WGZ-team.                                                                                  |
| 3 Process | 7. (-) Steun van de RvB/bestuur/divisies                    | De steun van de RvB/bestuur/divisies die wordt ervaren bij de uitvoering van de WGZ-implementatie mist. Het gevoel terug te kunnen vallen op hogere hand is niet aanwezig. |
| 3 Process | 8. (-) Ondersteunende afdelingen frustreren proces (ICT)    | Barriers ten aanzien van de WGZ-implementatie die te maken hebben met de ICT (Informatie- en communicatietechnologie).                                                     |
| 3 Process | 9. (-) Ondersteunende afdelingen frustreren proces (BI)     | Barriers ten aanzien van de WGZ-implementatie die te maken hebben met de BI (Business Intelligence).                                                                       |
| 3 Process | 10. (-) Ondersteunende afdelingen frustreren proces (ESC)   | Barriers ten aanzien van de WGZ-implementatie die te maken hebben met de ESC (Eva Service Centrum).                                                                        |
| 3 Process | 11. (+) Ondersteunende afdelingen geven mogelijkheden (ICT) | Facilitators ten aanzien van de WGZ-implementatie die te maken hebben met de ondersteuning vanuit de ICT.                                                                  |
| 3 Process | 12. (+) Ondersteunende afdelingen geven mogelijkheden (BI)  | Facilitators ten aanzien van de WGZ-implementatie die te maken hebben met ondersteuning vanuit BI (Business Intelligence).                                                 |
| 3 Process | 13. (+) Ondersteunende afdelingen geven mogelijkheden (ESC) | Facilitators ten aanzien van de WGZ-implementatie die te maken hebben met ondersteuning vanuit ESC (Eva Service Centrum).                                                  |
| 3 Process | 14. (+) Evenwicht in tempo ontwerpfase                      | Tempo houden in het proces wordt als nuttig ervaren, maar er moet wel voldoende tijd zijn om te wennen aan de beoogde verandering (ontwerpfase).                           |

|           |                                                                 |                                                                                                                                                                                                        |
|-----------|-----------------------------------------------------------------|--------------------------------------------------------------------------------------------------------------------------------------------------------------------------------------------------------|
|           |                                                                 |                                                                                                                                                                                                        |
| 3 Process | 15. (+) Team enthousiast/betrokken tijdens ontwerpfase          | Alle teamleden moeten betrokkenheid laten zien tijdens de ontwerpfase om verandering te kunnen bespreken en waarmaken.                                                                                 |
| 3 Process | 16. (-) Ingewikkeld bouwfase                                    | De bouwfase is ingewikkeld en niet duidelijk.                                                                                                                                                          |
| 3 Process | 17. (-) Lange tijd bezig/duurt lang (bouwfase)                  | De bouwfase duurt lang en de afdeling is lang bezig met de WGZ-implementatie.                                                                                                                          |
| 3 Process | 18. (-) Sturen op continue verbetering nog niet mogelijk        | Nog niet alle informatie kan uit de dashboards gehaald worden waardoor sturen op verbetering nog niet mogelijk is.                                                                                     |
| 3 Process | 19. (+) Data maakt continu verbeteren van het team mogelijk     | De effecten op patiëntengroepen van de zorg kunnen ingezien worden en geeft een beeld hoe de zorg wordt geleverd en wat de resultaten daarvan zijn en dit biedt mogelijkheden voor continu verbeteren. |
| 3 Process | 20. (+) Reflectie/evaluatie binnen team voor continu verbeteren | De data wordt gebruikt om de reflectie op het handelen en uitkomsten van het rapport te bespreken. Het is duidelijk hoe de zorg nog beter kan.                                                         |
| 3 Process | 21. (+) Zorgproces op één locatie                               | Zorg leveren op één locatie heeft voordeel voor waarde gedreven werken in de dagelijkse praktijk (link met 'lateralisatie brengt frustratie' en 'lateralisatie zorgt voor procesverbetering').         |
| 3 Process | 22. (+) Aanpakker nodig/trekker                                 | Er is een aanpakker/trekker nodig die het team trekt om het proces te realiseren en ondersteund bij dataverzameling/verwerking (link met Inner Setting, 'enthousiast en betrokken team').              |
| 3 Process | 23. (+) Zorgverlener als trekker                                | Een zorgverlener is een goede vertegenwoordiger van de groep en dus geschikt als trekker                                                                                                               |
| 3 Process | 24. (+) Patiënt competenties                                    | De patiënt moet in staat zijn om op hoger niveau mee te denken met recente ontwikkelingen in het                                                                                                       |

|           |                                                                |                                                                                                                                                                |
|-----------|----------------------------------------------------------------|----------------------------------------------------------------------------------------------------------------------------------------------------------------|
|           |                                                                | zorgteam. De patiënt moet bekwaam zijn om vertegenwoordiger te kunnen zijn van en grotere populatie (kwaliteit van de patiënt die betrokken word)..            |
| 3 Process | 25. (+) Patiënt betrekken is essentieel/prettig                | Het is goed patiënten te betrekken. Dit onderdeel van de het proces is nuttig. Het betrekken van patiënten gebeurt op verschillende manieren.                  |
| 3 Process | 26. (+) Patiënten (structureel) op meerdere momenten betrekken | Patiënten worden op verschillende momenten gedurende het jaar (structureel) betrokken tijdens de ontwikkeling.                                                 |
| 3 Process | 27. (+) Patiënt positieve ervaringen WGZ                       | Positieve ervaringen van patiënten over het behandeltraject/het WGZ-imeplementatie die aangegeven zijn bij de behandelaar/zorgverlener.                        |
| 3 Process | 28. (+) Patiënten zien de meerwaarde in van WGZ                | Patiënten geven aan bij hun behandelaar/de zorgverlener de meerwaarde in te zien van we WGZ-implementatie.                                                     |
| 3 Process | 29. (-) Patiënten rol heeft geen meerwaarde                    | De meerwaarde om de rol van de patiënt te realiseren binnen (alle fases van) het proces is niet aanwezig of niet bekend bij het team.                          |
| 3 Process | 30. (-) Patiënten vertegenwoordiging is lastig                 | Patiëntenverenigingen en individuele patiënten vertegenwoordigen niet de hele patiëntengroep.                                                                  |
| 3 Process | 31. (-) Patiënten verwachtingen rol                            | In de basis moet er scherp zijn wat er van de patiënt verwacht wordt en de patiënt moet daarbij begeleid worden en het is daarnaast belastend voor de patiënt. |

## 4 Outer setting

| Domain          | Code in Atlas.ti                   | Omschrijving van de code                                                                            |
|-----------------|------------------------------------|-----------------------------------------------------------------------------------------------------|
| 4 Outer setting | 1. (-) Druk door andere afdelingen | Binnen het team wordt druk ervaren die afkomstig is vanuit andere afdelingen/externen waardoor WGZ- |

|                 |                                                           |                                                                                                                                                                                                                                              |
|-----------------|-----------------------------------------------------------|----------------------------------------------------------------------------------------------------------------------------------------------------------------------------------------------------------------------------------------------|
|                 |                                                           | implementatie binnen het team hinder ondervindt.                                                                                                                                                                                             |
| 4 Outer setting | 2. (+) Externen motiveren                                 | Motivatie om betere zorg te leveren en de WGZ-implementatie te laten slagen wordt gestimuleerd door positieve reacties van externen, en er is motivatie om samen te werken met hen.                                                          |
| 4 Outer setting | 3. (-)<br>Aansluiting/communicatie tussen afdelingen mist | Afdelingen zijn te veel intern gericht waarbij kennis niet of te laat terechtkomt bij andere afdelingen. Er mist een aansluiting.                                                                                                            |
| 4 Outer setting | 4. (+) Goede communicatie tussen teams                    | Communicatie skills tussen teams en/of bestuur helpt om de WGZ-implementatie op gang te houden en te weten waar teams zich bevinden/mee bezig zijn.                                                                                          |
| 4 Outer setting | 5. (-) Pionieren is eenzaam                               | Er wordt met meerdere ziekenhuizen en/of externe partijen uitgevoerd. Wanneer afdelingen de eerste zijn met een bepaalde fase van de WGZ-implementatie vanuit hun specialisatie kan het als 'eenzaam' worden ervaren.                        |
| 4 Outer setting | 6. (-) Lateralisatie brengt frustratie                    | Er is frustratie door de lateralisatie van afdelingen en het proces daaromheen. (Lateralisatie specifiek voor werken met externe afdelingen. '(+) Zorg op één locatie' valt onder 'Process' want dat is een onderdeel van de WGZ-methodiek). |
| 4 Outer setting | 7. (+) Lateralisatie zorgt voor procesverbetering         | De lateralisatie maakt samenwerking met andere afdelingen makkelijker. Afdelingen zijn dichterbij voor patiënten en is communicatie is sneller.                                                                                              |

## 5 Inner setting

| Domain | Code in Atlas.ti | Omschrijving van de code |
|--------|------------------|--------------------------|
|--------|------------------|--------------------------|

|                 |                                                   |                                                                                                                                                                                                                                                          |
|-----------------|---------------------------------------------------|----------------------------------------------------------------------------------------------------------------------------------------------------------------------------------------------------------------------------------------------------------|
| 5 Inner setting | 1. (-) Onvoldoende borging proces binnen het team | Vervolgstappen die genomen moeten worden door het team, worden niet ondernomen om het proces op gang te houden.                                                                                                                                          |
| 5 Inner setting | 2. (-) Onduidelijkheid binnen het team            | Er heerst onduidelijkheid binnen het team op verschillende vlakken (bijv. onduidelijkheid in verwachtingen en/of rolverdelingen. (Onduidelijkheid over de methode valt onder thema 'Process' code '(-) Vier fases (methode) moeizame uitvoering').       |
| 5 Inner setting | 3. (+) Enthousiast en betrokken team              | Het team is in zijn geheel enthousiast en gedreven. De teamleden zijn bewust betrokken bij de WGZ- implementatie.                                                                                                                                        |
| 5 Inner setting | 4. (+) Communicatie binnen het team               | Binnen het team bespreken hoe je uitkomsten deelt, discussies voeren en gesprekken voeren vergemakkelijkt WGZ- implementatie.                                                                                                                            |
| 5 Inner setting | 5. (-) WGZ- implementatie kost tijd/investering   | Het team moet tijd en kennis investeren om de WGZ- implementatie mogelijk te maken.                                                                                                                                                                      |
| 5 Inner setting | 6. (+) Voldoende tijd beschikbaar                 | De tijd die beschikbaar wordt gesteld binnen het team om het proces uit te voeren is voldoende.                                                                                                                                                          |
| 5 Inner setting | 7. (-) Cultuur vertraagd WGZ- implementatie       | Gewoonten en (gedrags)regels binnen het team, (normen en waarden die het proces van de WGZ- implementatie bemoeilijken (bijv. de relatie tussen de arts en de patiënt waarbij de mening van de arts de boventoon voert i.p.v. de waarde van de patiënt). |

## 6 Characteristics of individuals

| Domain                           | Code in Atlas.ti    | Omschrijving van de code                                                   |
|----------------------------------|---------------------|----------------------------------------------------------------------------|
| 6 Characteristics of individuals | 1. (-) Confrontatie | Gepresenteerde individuele resultaten van zorgverlener zijn confronterend. |



|                                  |                                                             |                                                                                                                                                                                                                                                                    |
|----------------------------------|-------------------------------------------------------------|--------------------------------------------------------------------------------------------------------------------------------------------------------------------------------------------------------------------------------------------------------------------|
| 6 Characteristics of individuals | 2. (-) Bemoeienis/privacy schending door collega's/managers | Het inzien van resultaten van individuele zorgverleners door collega's en/of managers kan als bemoeienis en schending rondom privacy rondom het eigen werk worden gezien.                                                                                          |
| 6 Characteristics of individuals | 3. (-) Verandering brengt weerstand                         | Gedrag moeten aanpassen en reageren op verandering wordt niet als prettig ervaren en werkt de WGZ-implementatie tegen.                                                                                                                                             |
| 6 Characteristics of individuals | 4. (+) Selectie op enthousiaste/betrokken zorgverleners     | Proeftuinen bestaan uit de medewerkers die (over het algemeen) enthousiast zijn. Het gaat om het individu dat enthousiast is, empathie voelt voor de patiënten en zich betrokken voelt met de WGZ-implementatie om de waarde van de patiënt te verhogen.           |
| 6 Characteristics of individuals | 5. (+) Ruimte krijgen om te innoveren                       | Ruimte krijgen om te innoveren, te groeien en/of zich te ontwikkelen kan de WGZ-implementatie ten goede doen (link met professionaliseren & voldoende tijd (& enthousiaste zorgverleners)), en de juiste capaciteiten bezit om de implementatie mogelijk te maken. |
| 6 Characteristics of individuals | 6. (-) Motivatie neemt af naarmate de tijd vordert          | Motivatie om de WGZ-implementatie te realiseren wordt minder naarmate de tijd vordert.                                                                                                                                                                             |
| 6 Characteristics of individuals | 7. (+) Motivatie blijft gelijk over de tijd                 | Motivatie blijft gelijk naarmate de tijd vordert.                                                                                                                                                                                                                  |

## 7 Suggestions

| Domein        | Code in Atlas.ti | Omschrijving van de code                                                                                                                          |
|---------------|------------------|---------------------------------------------------------------------------------------------------------------------------------------------------|
| 7 Suggestions | Suggestion       | Een suggestie is een factor die wordt benoemd hoe het beter zou kunnen, en wordt dus altijd benoemd in combinatie met een facilitator of barrier. |
